# Supplementary material
Source: PubMed Central journal article supplement (PMC4573896)

**A**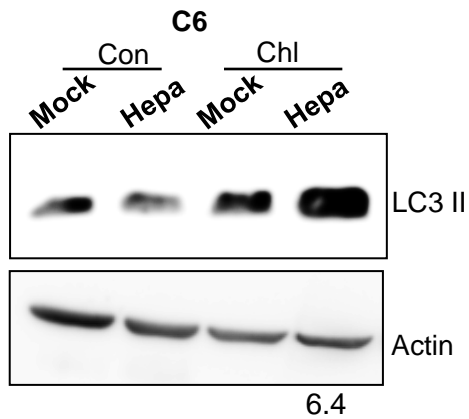**B**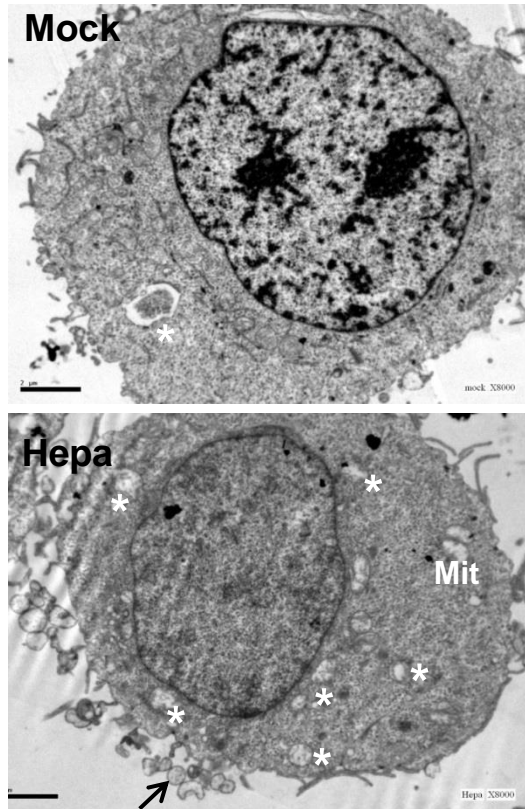**C**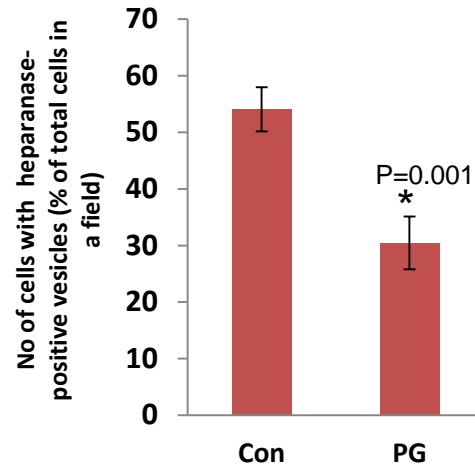**D**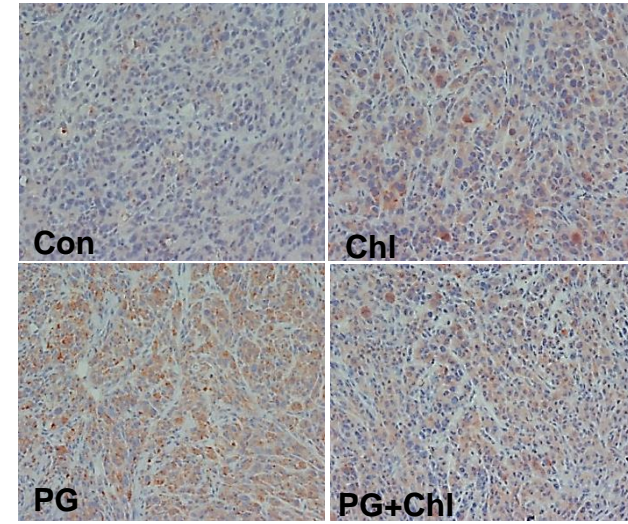**E**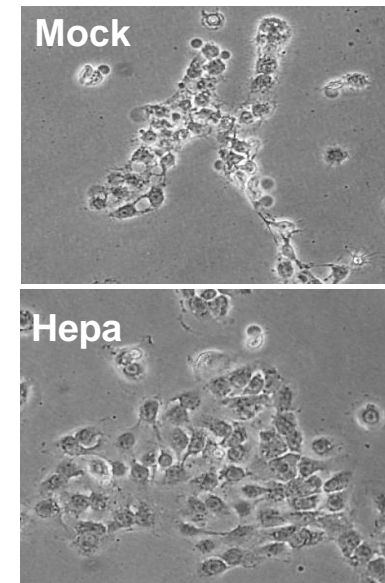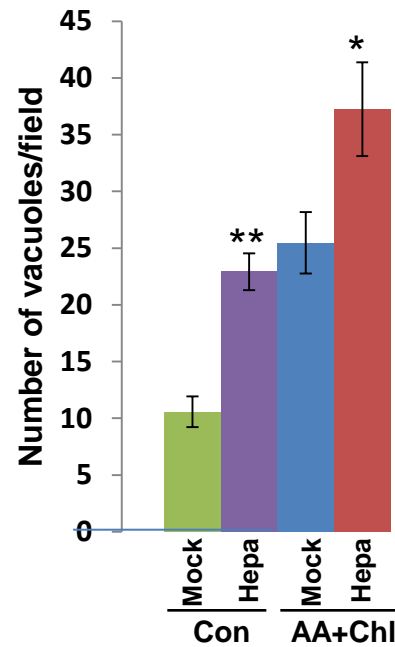

\*\*p=0.00001 for Mock vs Hepa Con

\*p=0.01 for Mock vs Hepa AA+Chl

Supplement: NIHMS712491-supplement-1.pdf [file NIHMS712491-supplement-1.pdf]

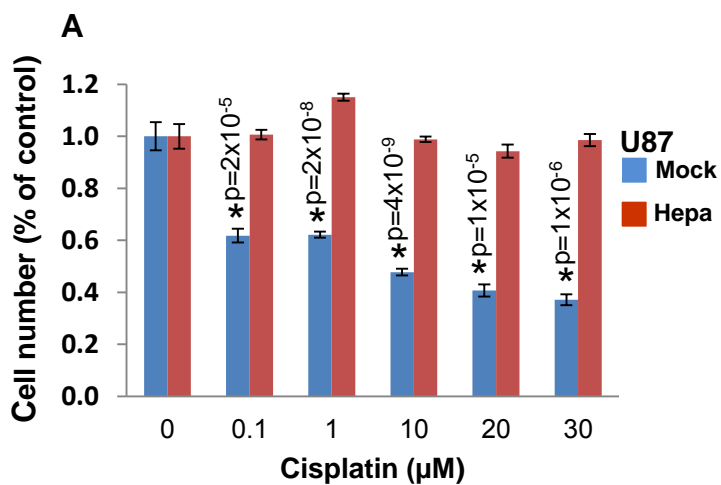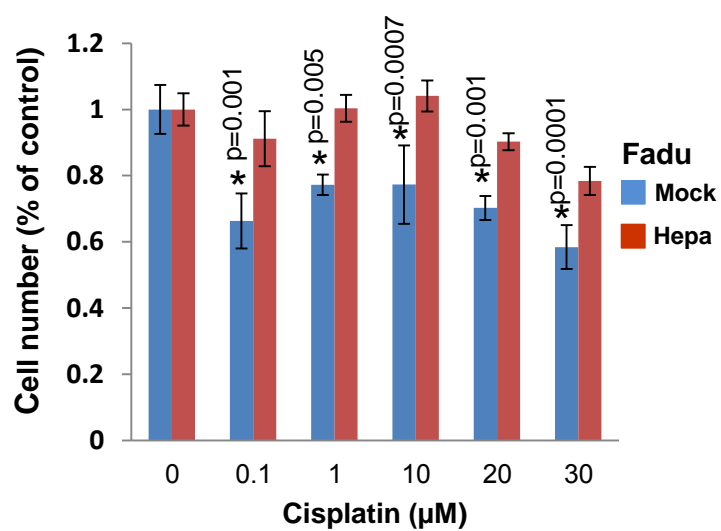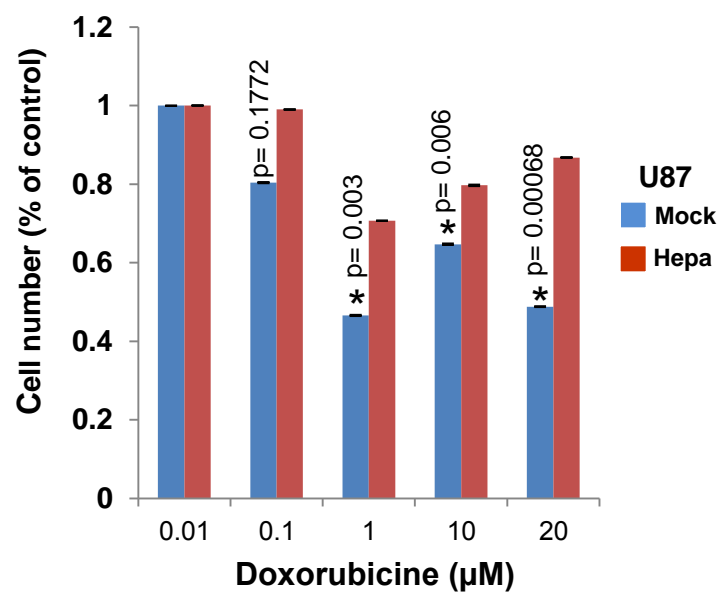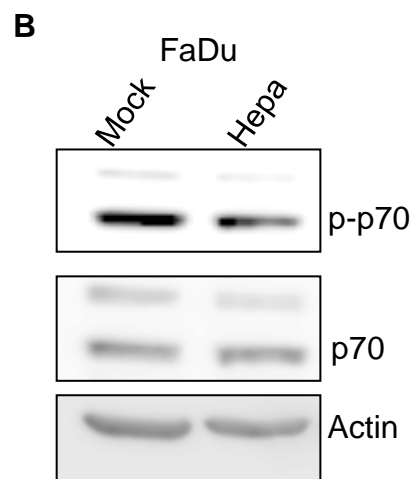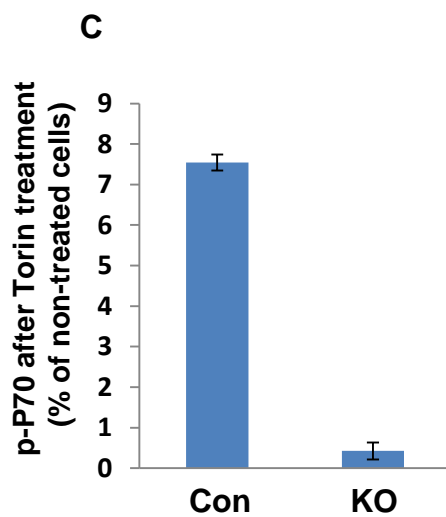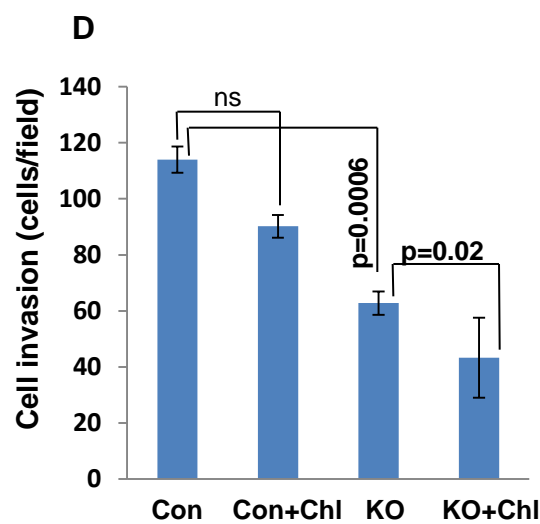

Suppl.  
Fig. 2

Supplement: NIHMS712491-supplement-2.pdf [file NIHMS712491-supplement-2.pdf]

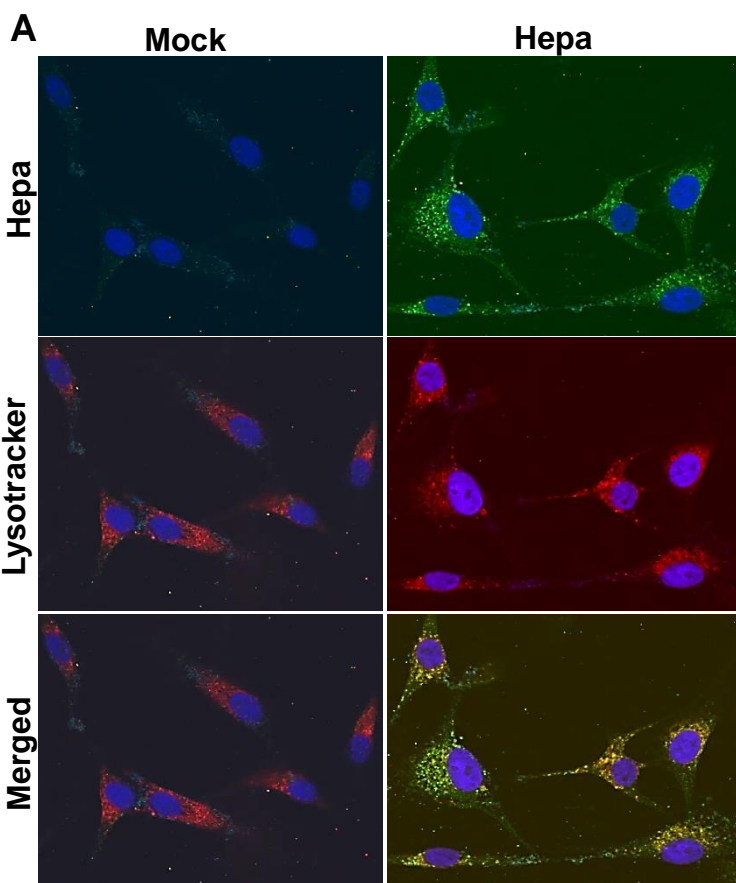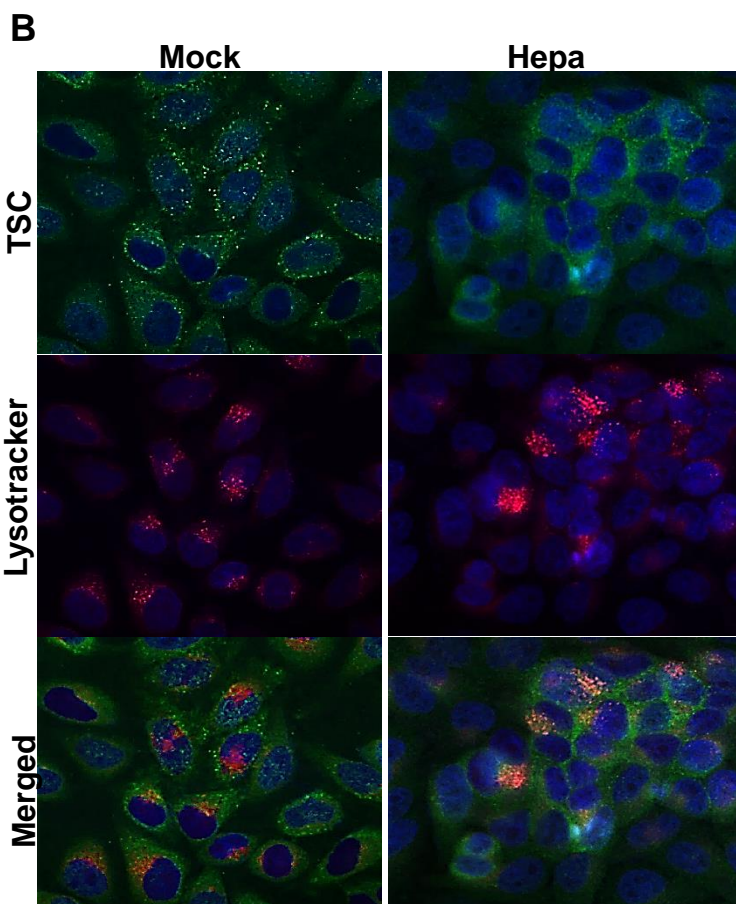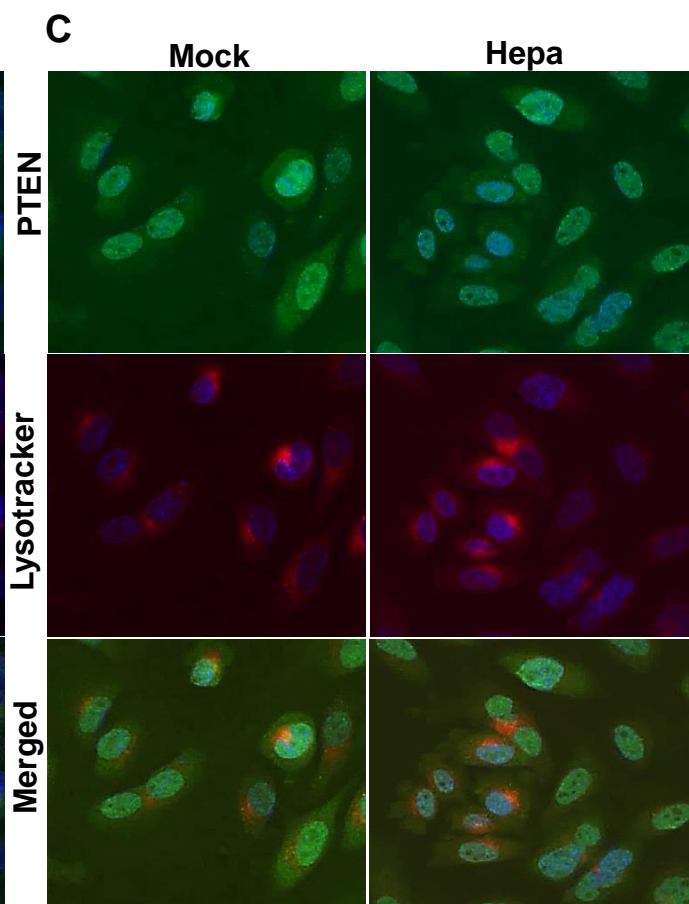

Supplement: NIHMS712491-supplement-3.pdf [file NIHMS712491-supplement-3.pdf]
